# Supplementary material for: From Strain Characterization to Field Authorization: Highlights on Bacillus velezensis Strain B25 Beneficial Properties for Plants and Its Activities on Phytopathogenic Fungi
Source: MDPI journal article supplement (doi:10.3390/microorganisms9091924), 2021-09-10
Supplement: s1 [file s1]

**Table S1.** *Bacillus velezensis* strain B25 genes coding for xylanase and glucanase enzymes.

| Label       | Gene | Length | Product                     | EC number         |
|-------------|------|--------|-----------------------------|-------------------|
| BAMMD1_1760 | xynC | 1272   | endo-xylanase               | 3.2.1.136         |
| BAMMD1_3310 | xynA | 642    | endo-1,4-beta-xylanase      | 3.2.1.8           |
| BAMMD1_1755 | eglS | 1500   | endo-1,4-beta-glucanase     | 3.2.1.4           |
| BAMMD1_3541 | bglS | 732    | endo-beta-1,3-1,4 glucanase | 3.2.1.73, 3.2.1.6 |

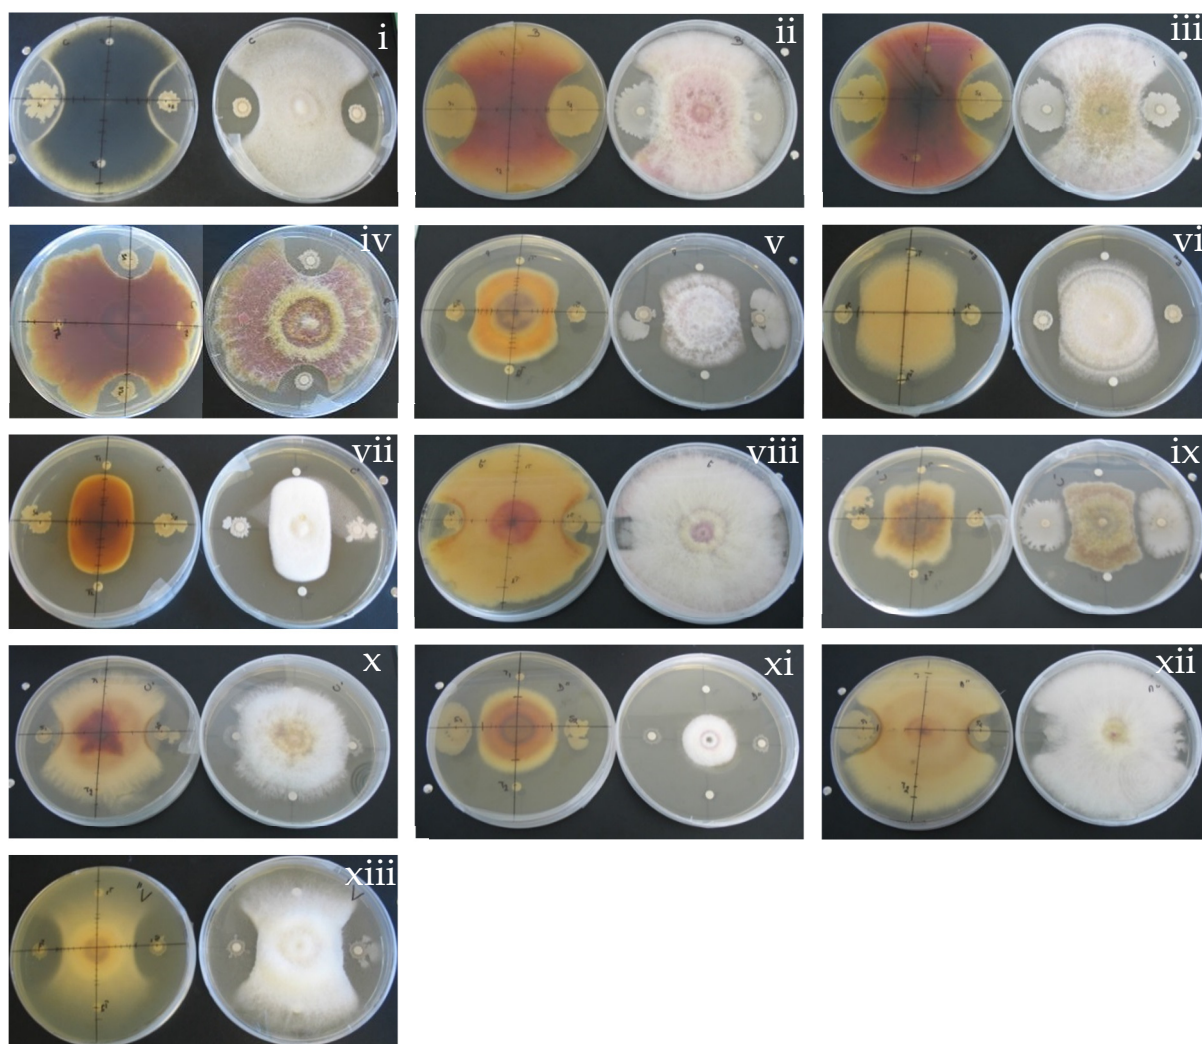

**Figure S1.** Back view (left) and front view (right) of challenge co-cultures of *Bacillus velezensis* B25 against pathogenic fungi (i) *Gaeumannomyces graminis* B278; (ii) *Fusarium graminearum* B375; (iii) *Fusarium culmorum* B376; (iv) *Fusarium graminearum* B377, (v) *Fusarium moniliforme* B378; (vi) *Microdochium nivale* B379; (vii) *Septoria nodorum* B380; (viii) *Fusarium graminearum* FG183 B381; (ix) *Fusarium graminearum* FG171 B382; (x) *Fusarium graminearum* B383; (xi) *Fusarium verticillioides* FV63 B384; (xii) *Fusarium graminearum* FG 155 B385 and (xiii) *Fusarium verticillioides* FV838 B386.

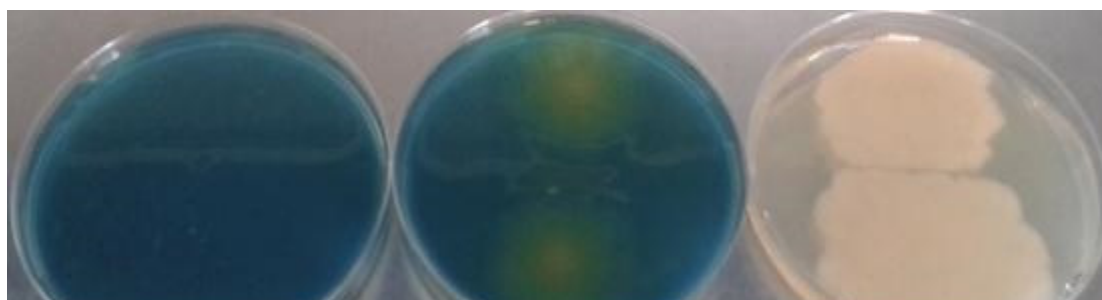

**Figure S2.** Screening for siderophores production ability of *Bacillus velezensis* B25: Control-1 non-inoculated (left), test (middle), Control-2 B25 without O-CAS (right).
